# Supplementary material
Source: PubMed Central journal article supplement (PMC8223358)
Supplement: 12889_2021_11233_MOESM1_ESM.pdf [file 12889_2021_11233_MOESM1_ESM.pdf]

Perkins R, Mason-Bertrand A, Tymoszuk U, Spiro N, Gee K, and Williamon A (2021), Arts engagement supports social connectedness in adulthood: findings from the HEartS Survey, *BMC Public Health*.  
doi: 10.1186/s12889-021-11233-6

**SUPPLEMENTARY TABLE 1** | Sociodemographic, economic, and health and wellbeing characteristics of the respondents.

| <b>Sociodemographic and economic characteristics (N=5892)</b> |             |           |
|---------------------------------------------------------------|-------------|-----------|
| <b>Age</b>                                                    | <i>mean</i> | <i>SD</i> |
|                                                               | 45.86       | 16.90     |
|                                                               | <i>n</i>    | <i>%</i>  |
| 18-25                                                         | 775         | 13        |
| 26-35                                                         | 1221        | 21        |
| 36-45                                                         | 1021        | 17        |
| 46-55                                                         | 909         | 15        |
| 56-65                                                         | 1026        | 17        |
| 66-75                                                         | 796         | 14        |
| 76-94                                                         | 144         | 2         |
| <b>Gender</b>                                                 |             |           |
| Women                                                         | 3027        | 51        |
| Men                                                           | 2835        | 48        |
| Would rather not say                                          | 12          | 0         |
| Other                                                         | 18          | 0         |
| <b>Region</b>                                                 |             |           |
| Northern Scotland                                             | 136         | 2         |
| Southern Scotland                                             | 265         | 4         |
| North East                                                    | 216         | 4         |
| North West                                                    | 667         | 11        |
| Yorkshire and the Humber                                      | 500         | 8         |
| East Midlands                                                 | 440         | 7         |
| West Midlands                                                 | 531         | 9         |
| East of England                                               | 559         | 9         |
| South East                                                    | 829         | 14        |
| South West                                                    | 517         | 9         |
| London                                                        | 770         | 13        |
| North Wales                                                   | 79          | 1         |
| South Wales                                                   | 219         | 4         |
| Northern Ireland                                              | 164         | 3         |
| <b>Ethnicity</b>                                              |             |           |
| White British or Irish                                        | 5032        | 85        |
| Any other White background                                    | 264         | 4         |
| Mixed ethnic backgrounds*                                     | 136         | 2         |
| Asian ethnic backgrounds*                                     | 275         | 5         |
| Black ethnic backgrounds*                                     | 146         | 2         |
| Any other ethnic background                                   | 39          | 1         |
| <b>Education</b>                                              |             |           |
| No formal qualification                                       | 213         | 4         |
| Other vocational and foreign qualifications                   | 691         | 12        |
| GCSE, O Level, AS Level – NVQ Level 1-2                       | 1507        | 26        |
| A level, baccalaureate – NVQ Level 3                          | 1340        | 23        |
| University degree – NVQ Level 4-5                             | 2137        | 36        |
| Would rather not say                                          | 4           | 0         |

**Living status**

|                                         |      |    |
|-----------------------------------------|------|----|
| Lone living                             | 1199 | 20 |
| With partner only                       | 2047 | 35 |
| With children (with or without partner) | 1725 | 29 |
| With family, house share, and other     | 893  | 15 |
| Would rather not say                    | 28   | 0  |

**Household income**

|                           |     |    |
|---------------------------|-----|----|
| Up to £5,199              | 233 | 4  |
| £5,200 and up to £10,399  | 406 | 7  |
| £10,400 and up to £15,599 | 568 | 10 |
| £15,600 and up to £20,799 | 604 | 10 |
| £20,800 and up to £25,999 | 635 | 11 |
| £26,000 and up to £31,199 | 614 | 10 |
| £31,200 and up to £36,399 | 405 | 7  |
| £36,400 and up to £41,599 | 441 | 7  |
| £41,600 and up to £46,799 | 298 | 5  |
| £46,800 and up to £51,999 | 311 | 5  |
| £52,000 and up to £75,999 | 547 | 9  |
| £76,000 and above         | 344 | 6  |
| Would rather not say      | 486 | 8  |

**Social connectedness, loneliness, and depression**

| <b>Social connectedness</b>            | <i>mean</i> | <i>SD</i> |
|----------------------------------------|-------------|-----------|
| Social connectedness scale, score 0-75 | 41.62       | 15.37     |
| <b>Loneliness</b>                      |             |           |
| Score (UCLA, 3-9)                      | 5.27        | 1.96      |
|                                        | <i>n</i>    | %         |
| Cases (UCLA, cutoff $\geq$ 6)          | 2722        | 46        |
| <b>Depression</b>                      |             |           |
| Score (CES-D 8, 0-8)                   | 4.49        | 2.04      |
|                                        | <i>n</i>    | %         |
| Cases (CES-D 8, cutoff $\geq$ 3)       | 4600        | 78        |

\* Ethnicity: any mixed background includes White and Black Caribbean, White and Black African, White and Asian, and any other mixed background; any Asian background includes Indian, Pakistani, Bangladeshi, Chinese, or any other Asian background; any Black background includes Caribbean, African, and any other Black background.
